# Supplementary material
Source: Copernicus journal article supplement (doi:10.5194/egusphere-2026-2788)
Supplement: Supplementary file 1 [file Survey example.pdf › Science_and_Art_Festival_Files/Survey example.pdf]

**ENCUESTA: Impacto de GeoArte en la apropiación del conocimiento geológico**

**Datos demográficos (obligatorios):**

1. Edad: 14
2. Género: ☒ F ☐ M ☐ Otro
3. Nivel educativo:
  - ☐ Primaria / Secundaria / Técnico/Superior / Universitario / Posgrado
4. ¿Ha asistido antes al FIAVL? ☐ Sí ☒ No
5. ¿Tenía conocimientos previos sobre geología?

Nada / Poco / Medio / Mucho

**📌 Bloque A: Comprensión del contenido**

(Responda del 1 al 5, donde 1 es "nada" y 5 es "mucho")

6. ¿Cuánto considera que aprendió sobre el patrimonio geológico del sur del Ecuador?

|   |   |   |   |          |
|---|---|---|---|----------|
| 1 | 2 | 3 | 4 | <u>5</u> |
|---|---|---|---|----------|

7. ¿Comprendió la relación entre las obras artísticas y los conceptos geológicos?

|   |   |   |          |   |
|---|---|---|----------|---|
| 1 | 2 | 3 | <u>4</u> | 5 |
|---|---|---|----------|---|

8. ¿Cree que ahora podría explicar qué es un mineral o un fósil a otra persona?

|   |   |   |   |          |
|---|---|---|---|----------|
| 1 | 2 | 3 | 4 | <u>5</u> |
|---|---|---|---|----------|

9. ¿Crees que el arte ayuda a comprender mejor los temas científicos como la geología?

|   |   |   |   |          |
|---|---|---|---|----------|
| 1 | 2 | 3 | 4 | <u>5</u> |
|---|---|---|---|----------|

**♥ Bloque B: Valoración y percepción**

10. ¿Qué tan importante le parece proteger el patrimonio geológico local?

Nada importante / Poco importante / Medianamente importante / Importante / Muy importante

11. Después de la visita, ¿cree que el patrimonio geológico puede tener valor educativo, turístico o cultural para su comunidad?

- Totalmente en desacuerdo
- En desacuerdo
- Neutral
- De acuerdo
- Totalmente de acuerdo

**Bloque C: Experiencia con la exposición**

12. ¿Qué tipo de elementos le parecieron más atractivos?

- Obras artísticas (pinturas, esculturas, etc.)
- Piezas geológicas (rocas, fósiles, minerales)
- Actividades interactivas / talleres

13. ¿Qué tan satisfecho/a se sintió con la experiencia general en GeoArte?

- Nada satisfecho
- Poco satisfecho
- Neutral
- Satisfecho
- Muy satisfecho

14. ¿Recomendaría a otras personas visitar esta exposición?

- Sí
- No
- Tal vez

---

15. ¿Qué te llamó la atención de la exposición GeoArte?

La cantidad de minerales, rocas y fósiles que existe en el planeta y toda la historia que cuentan

---

**Comentario adicional (opcional):**

16. ¿Desea compartir alguna idea, reflexión o sugerencia sobre GeoArte?

Que debemos cuidar todo sobre nuestro planeta ya que guarda la historia del mundo por mínima o pequeña que sea

---

---
